# Supplementary material for: Structural and Functional Insights into Human Nuclear Cyclophilins
Source: MDPI journal article supplement (doi:10.3390/biom8040161), 2018-12-04
Supplement: s1 [file s1]

[illegible]

|       | % ident | %sim | RMSD (Å) | notes            | residues in alignment |
|-------|---------|------|----------|------------------|-----------------------|
| PPIH  | 54      | 69   | 0.477    | cyclophilin only | 9-177                 |
| PPIE  | 68      | 82   | 0.406    | cyclophilin only | 1-156                 |
| PPIL1 | 51      | 67   | 1.604    | NMR structure    | 12-139                |
| PPIL2 | 50      | 61   | 0.699    | cyclophilin only | 35-161                |
| PPIL3 | 48      | 61   | 0.731    |                  | 9-144                 |
| CWC27 | 43      | 61   | 0.797    | cyclophilin only | 22-133                |
| PPWD1 | 49      | 59   | 0.814    | cyclophilin only | 38-184                |
| PPIG  | 57      | 66   | 0.46     | cyclophilin only | 8-155                 |

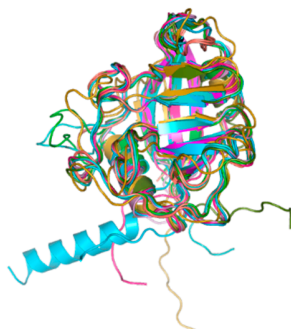

**Figure S1.** Alignment of the spliceophilins against the canonical cyclophilin PPIA. **(A)** Sequence alignment as performed by the MULTALIN server. **(B)** Quantification of % identity and % similarity across the primary sequence of the cyclophilin domains as calculated in pairwise alignment within BLASTp. Also, quantification of structural alignment (RMSD) between each spliceophilin structure and PPIA as reported by pyMOL. **(C)** Visual representation in cartoon format of a representative of each spliceophilin structure aligned with PPIA.
